# Supplementary material
Source: PubMed Central journal article supplement (PMC4800792)
Supplement: MCB.01013-15_zmb999101186so1.pdf [file MCB.01013-15_zmb999101186so1.pdf]

**Supplementary Data**

**Evolution and Functional Trajectory of Sir1 in Gene Silencing**

Aisha Ellahi<sup>1</sup> and Jasper Rine<sup>1#</sup>

<sup>1</sup>Department of Molecular and Cell Biology  
California Institute of Quantitative Biology  
UC Berkeley, Berkeley California 94720

<sup>#</sup>Corresponding author.

Phone: 510-642-7047

Email: [jrine@berkeley.edu](mailto:jrine@berkeley.edu)

Supplemental Figures

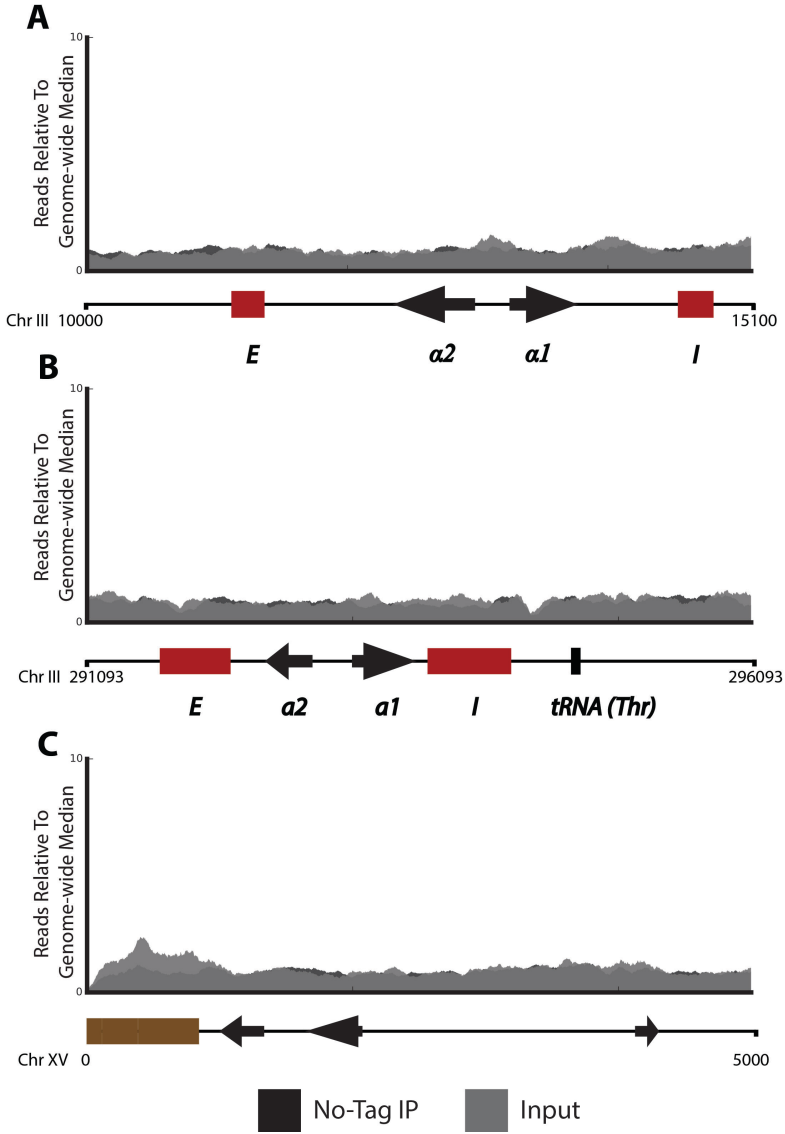

**Figure S1. No tag IP and input enrichment in *S. cerevisiae*.** No tag IP and input tracks shown for *S. cerevisiae* at *HMLα* (A), *HMRA* (B), and *TEL15L* (C). IP shown in black, input in gray, in terms of reads relative to genome-wide median.

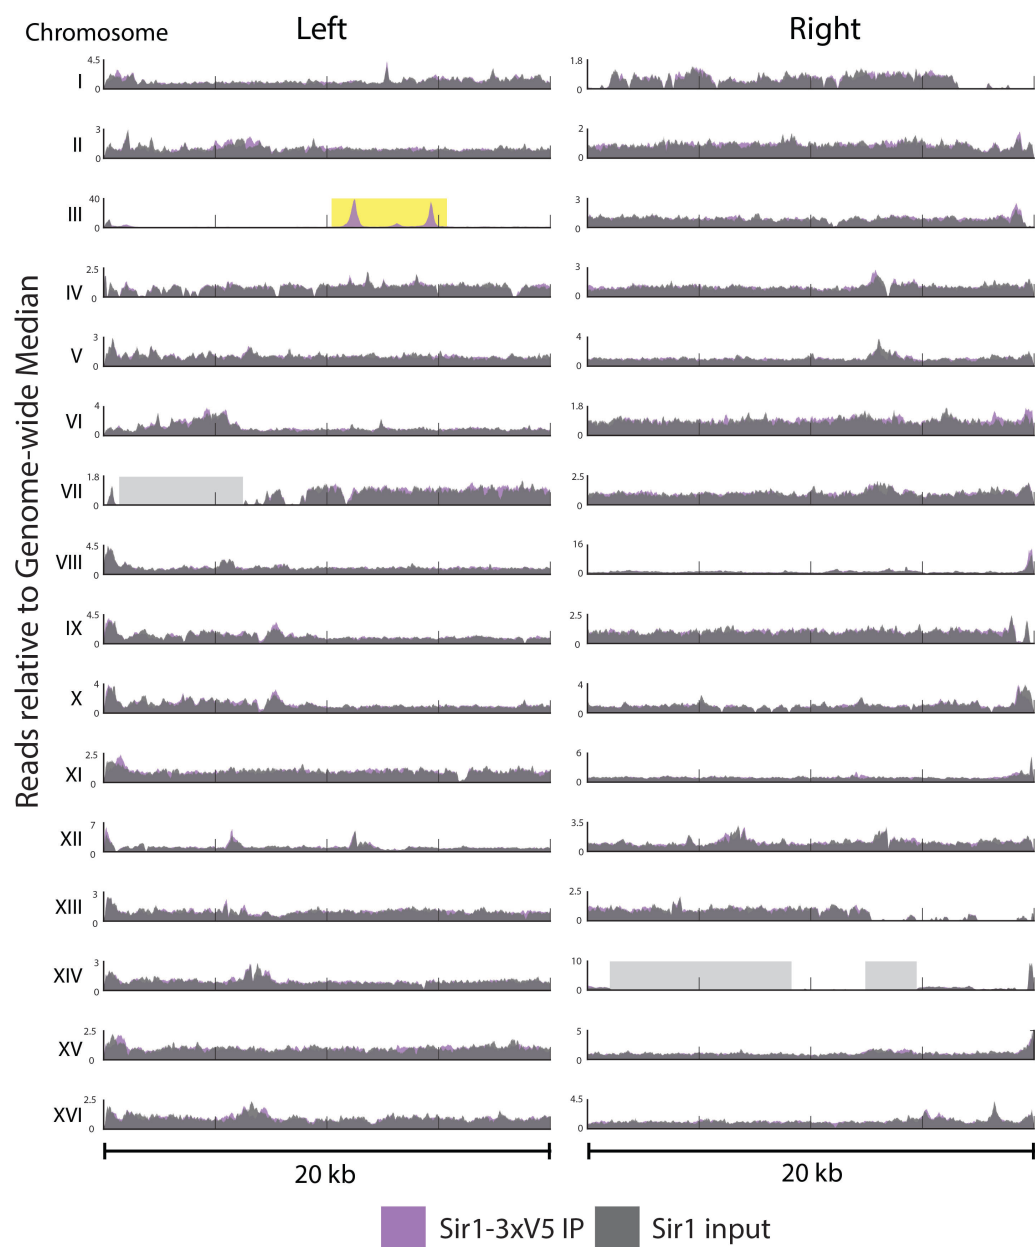

**Figure S2. Lack of Sir1 enrichment at 31 out of 32 *S. cerevisiae* telomeres (W303 strain).** Sir1 IP shown in purple, input shown in gray. Sir1 enrichment is seen at *HML $\alpha$*  on *TEL03L* (yellow box). 20kb inward from the left and right ends of each chromosome is shown. Regions deleted in the W303 strain relative to S288C are shown in gray.

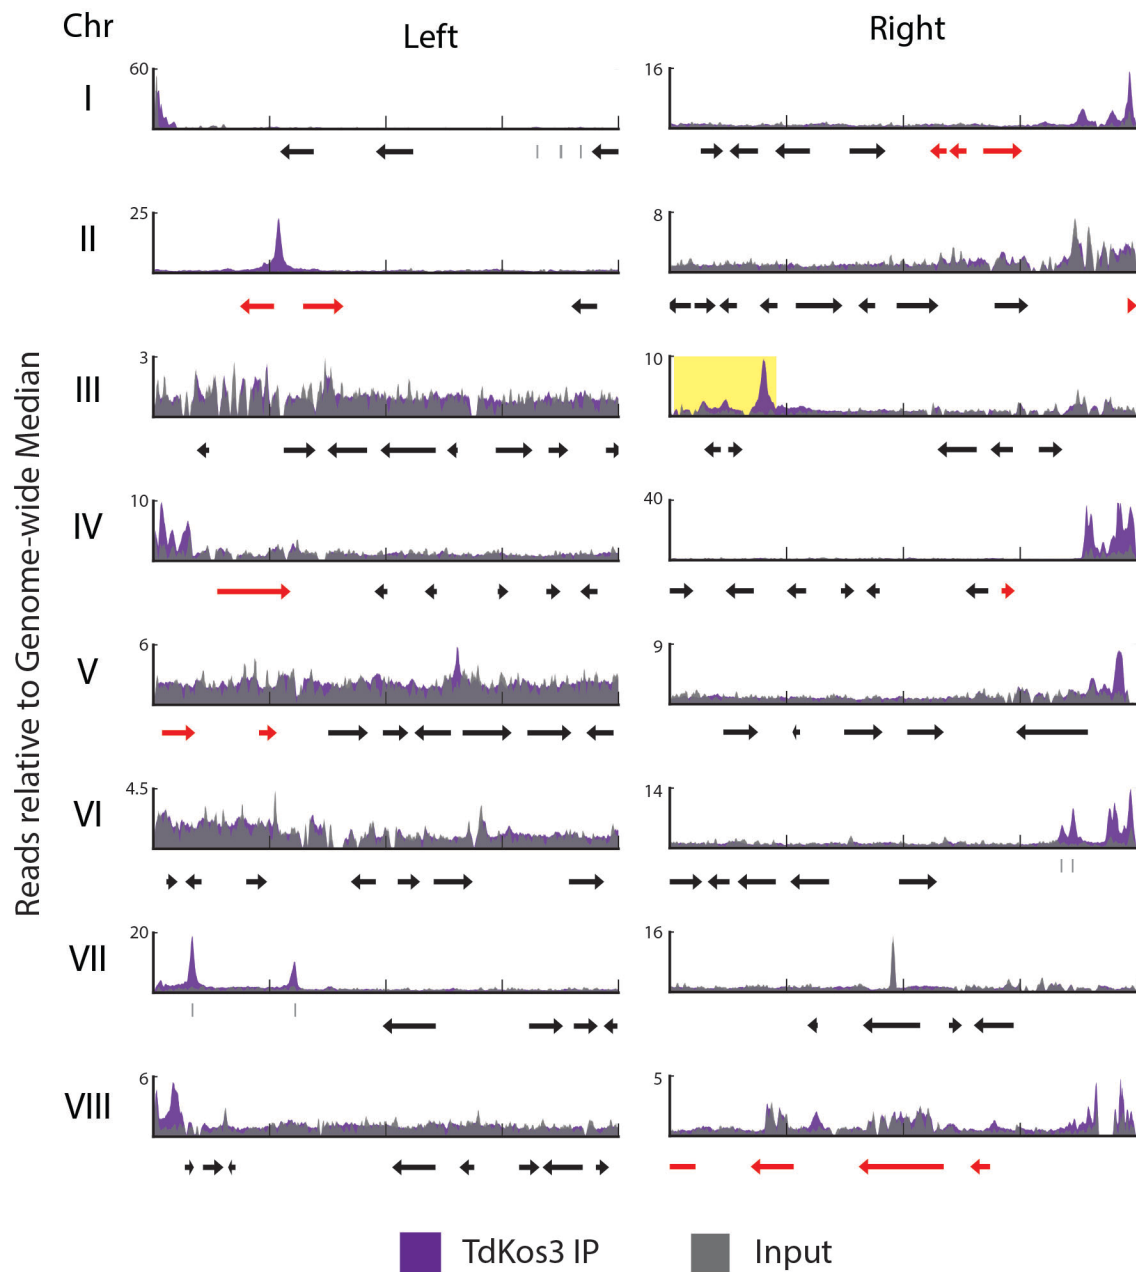

Figure S3. Enrichment of Kos3 (dark purple) at eleven telomeres in *T. delbrueckii*:

*TEL01L*, *TEL01R*, *TEL02L*, *TEL03R*, *TEL04L*, *TEL04R*, *TEL05R*, *TEL06R*,

*TEL07L*, *TEL08L*, and *TEL08R*. Open reading frames (ORFs) are depicted in black arrows

and tRNA genes are depicted in gray boxes. *HML* on *TEL03R* is boxed in yellow. Subtelomeric

genes that significantly increased in expression in all three *sir* mutants relative to wild type are shown as red arrows. Enrichment patterns for Td-Sir2 and Td-Sir4 were highly similar.

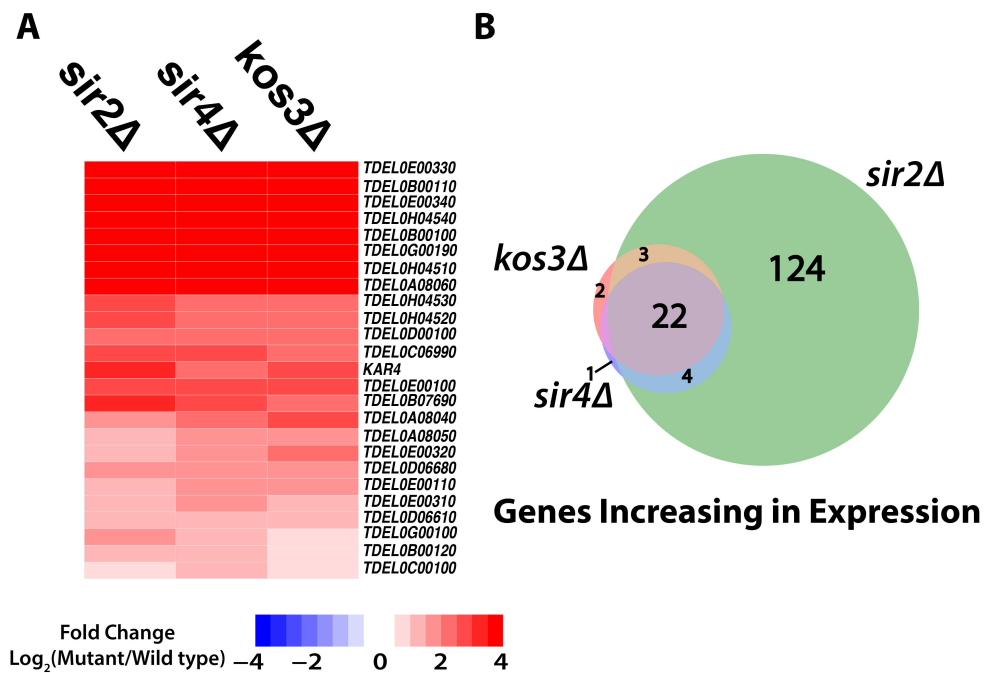

**Figure S4. Summary of genes that significantly increased in expression in all three *sir* mutants in *T. delbrueckii* (*kos3Δ*, *sir2Δ*, and *sir4Δ*).** (A) Heatmap of all genes that increased significantly relative to Wild type (red boxes) across all three mutants. (B) Venn diagram showing overlap of all genes that significantly increased in *kos3Δ*, *sir2Δ*, and *sir4Δ*. Genes whose expression increased in *kos3Δ* and *sir4Δ* were largely a subset of those whose expression increased in *sir2Δ*; suggesting that *SIR2* regulates many other genes in addition to the genes at telomeres, *HML* and the two copies of *HMR* in *T. delbrueckii*.

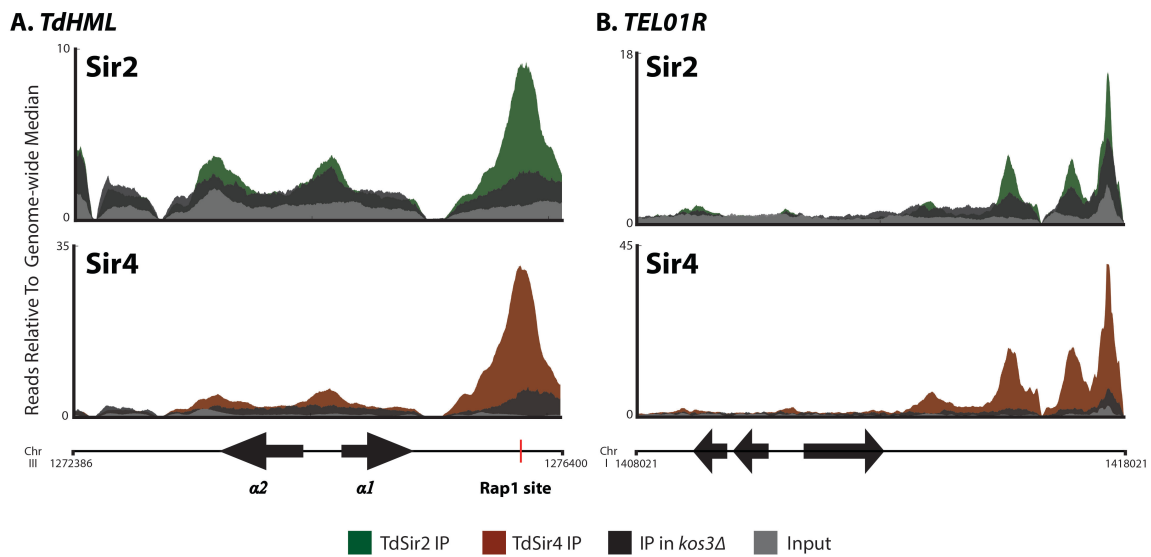

**Figure S5.** Sir2 and Sir4 had reduced enrichment at *HML* (A) and a representative telomere, *TEL01R* (B) in *kos3Δ* strains. Enrichment in *KOS3* wild-type strains for Sir2 and Sir4 shown in green and brown, respectively. Enrichment of Sir2 and Sir4 in the *kos3Δ* strain is shown in black. The signal from input chromatin is shown in gray. Genes are marked with black arrows; Rap1 site at *HML* is marked with red line.

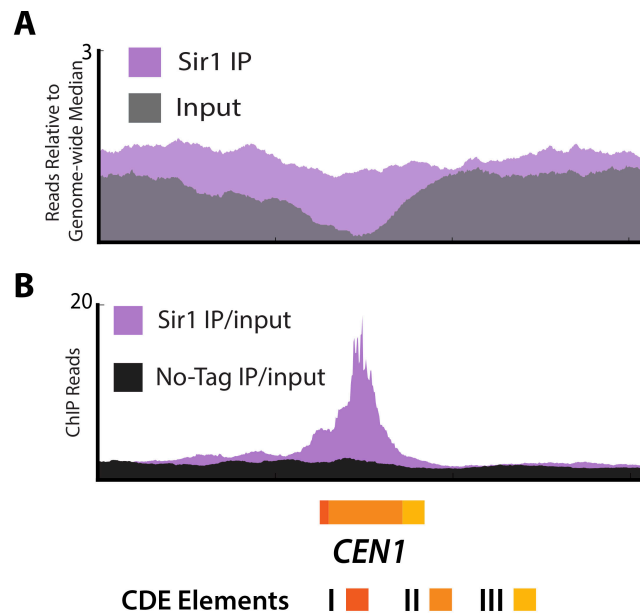

**Figure S6. Under-enrichment of IP and input at *S. cerevisiae* centromeres.** (A) Enrichment of Sir1 IP and input shown separately at *CEN1*. The input appears under-enriched. (B) Enrichment of Sir1 at *CEN1* viewed as IP over input. The No-tag negative control IP over input is shown in black.

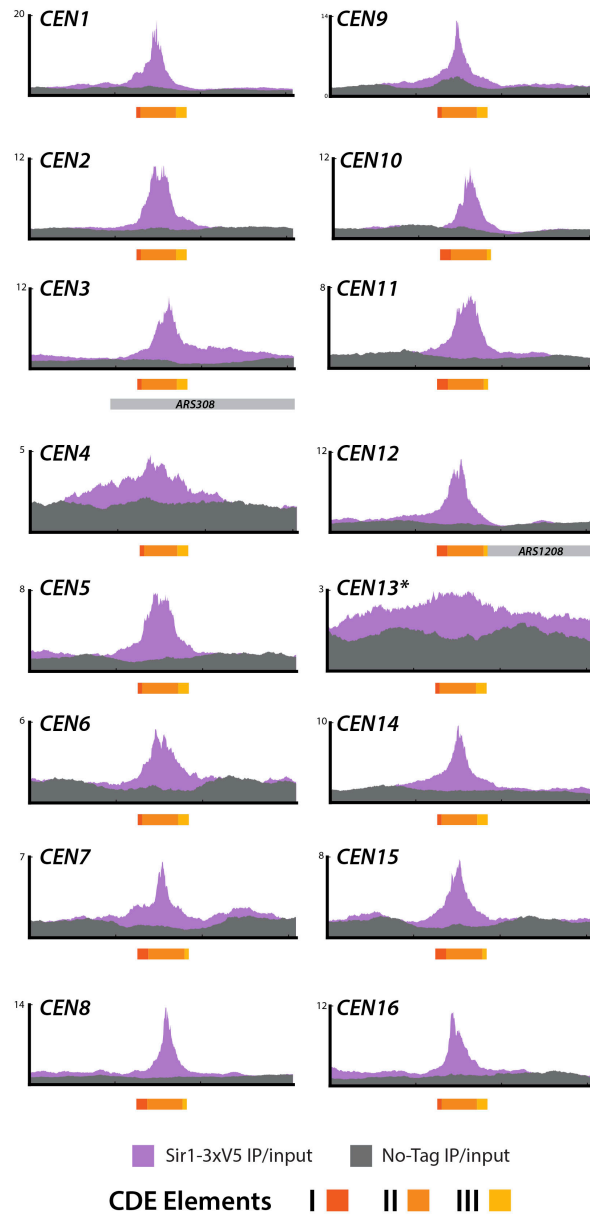

**Figure S7. Sir1 enrichment at all 16 centromeres in *S. cerevisiae*.** Enrichment is shown as IP over input. IP over input of the no-tag control is shown in gray. \*The enrichment seen at *CEN13* is likely to be non-specific, as its enrichment was not greater than the IP over input of GFP-NLS, a protein expected to non-specifically bind in the genome. Centromere sequence elements, CDE I, CDE II, and CDE III are marked with red orange, orange, and yellow boxes, respectively.



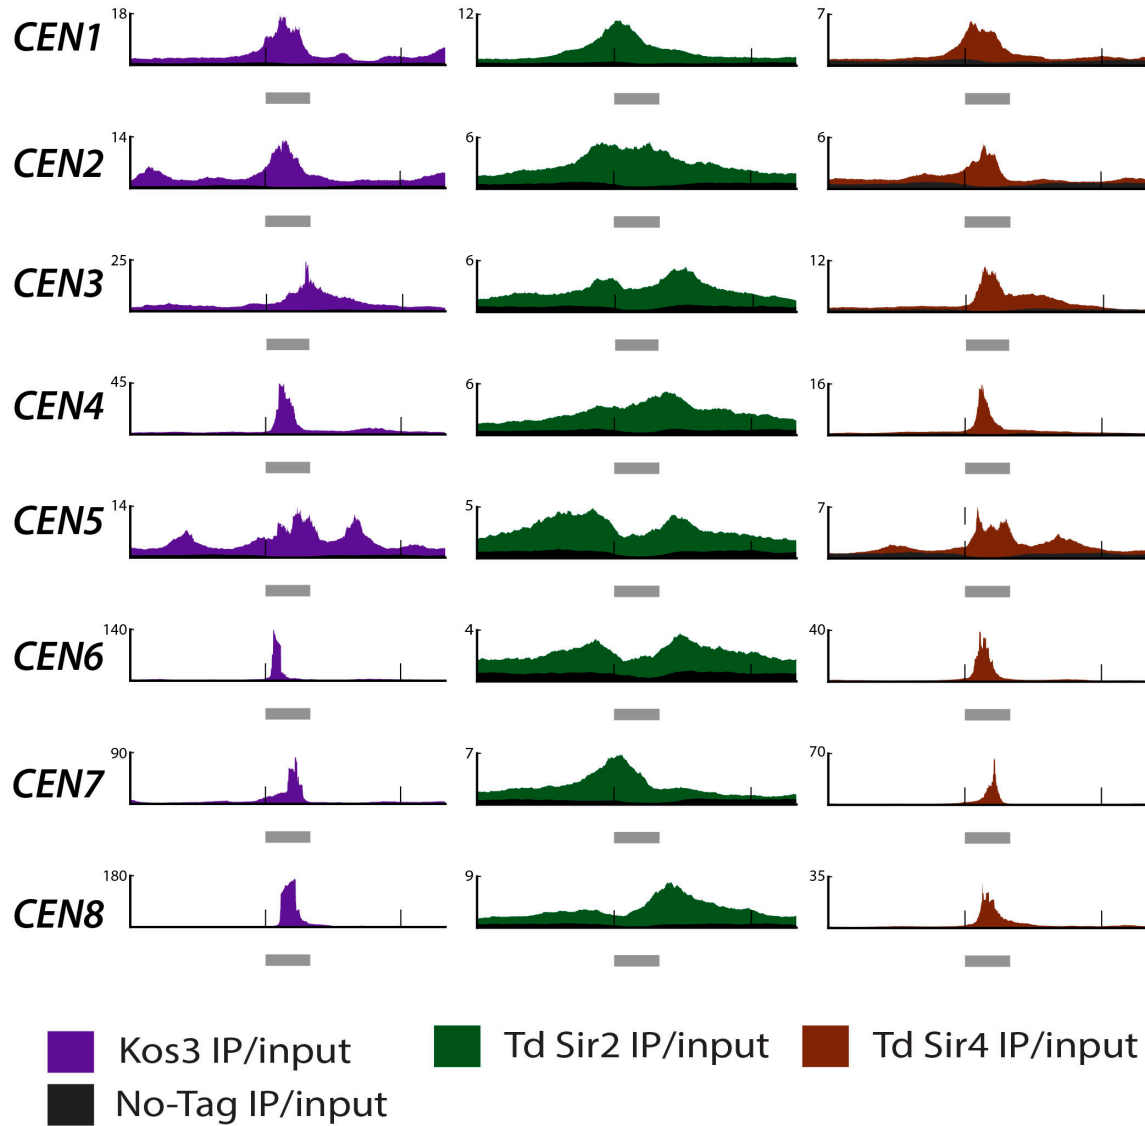

**Figure S8. Enrichment of Kos3, Sir2, and Sir4 at all 8 *T. delbrueckii* centromeres.** Enrichment is shown as IP/input (centromeres marked with gray boxes; tick marks represent 500 base pairs). Functionality of two centromeres, *CEN1* and *CEN3*, was confirmed experimentally.

## Supplementary Tables

### Table S1 Strains Used In This Study

\*Unless otherwise indicated, strains were constructed for this study.

| Name     | Species               | Genotype                                                                              | Source*               |
|----------|-----------------------|---------------------------------------------------------------------------------------|-----------------------|
| JRY10152 | <i>S. cerevisiae</i>  | <i>matΔ::HygMX can1-100 his3-11 leu2-3,112 lys2- trp1-1 ura3-52 SIR1-3xV5-KanMX</i>   |                       |
| JRY9316  | <i>S. cerevisiae</i>  | <i>matΔ::HygMX can1-100 his3-11 leu2-3,112 lys2- trp1-1 ura3-52</i>                   | Teytelman et al. 2013 |
| JRY9319  | <i>S. cerevisiae</i>  | <i>matΔ::HygMX lys2 his3-11 leu2-3,112 trp1-1 ura3-52 can1-100 SIR2-13xMyc::KanMX</i> | “                     |
| JRY10153 | <i>S. cerevisiae</i>  | <i>matΔ::HygMX can1-100 his3-11 leu2-3,112 lys2- trp1-1 ura3-52 sir1Δ::KanMX</i>      |                       |
| JRY10154 | <i>S. cerevisiae</i>  | <i>matΔ::HygMX can1-100 his3-11 leu2-3,112 lys2- trp1-1 ura3-52 sir1Δ::KanMX</i>      |                       |
| JRY10155 | <i>S. cerevisiae</i>  | <i>matΔ::HygMX can1-100 his3-11 leu2-3,112 lys2- trp1-1 ura3-52 sir1Δ::KanMX</i>      |                       |
| JRY9720  | <i>S. cerevisiae</i>  | <i>matΔ::HygMX can1-100 his3-11 leu2-3,112 lys2- trp1-1 ura3-52 sir2Δ::KanMX</i>      | Ellahi et al. 2015    |
| JRY9721  | <i>S. cerevisiae</i>  | <i>matΔ::HygMX can1-100 his3-11 leu2-3,112 lys2- trp1-1 ura3-52 sir2Δ::KanMX</i>      | “                     |
| JRY9722  | <i>S. cerevisiae</i>  | <i>matΔ::HygMX can1-100 his3-11 leu2-3,112 lys2- trp1-1 ura3-52 sir2Δ::KanMX</i>      | “                     |
| JRY9723  | <i>S. cerevisiae</i>  | <i>matΔ::HygMX can1-100 his3-11 leu2-3,112 lys2- trp1-1 ura3-52 sir3Δ::KanMX</i>      | “                     |
| JRY9724  | <i>S. cerevisiae</i>  | <i>matΔ::HygMX can1-100 his3-11 leu2-3,112 lys2- trp1-1 ura3-52 sir3Δ::KanMX</i>      | “                     |
| JRY9725  | <i>S. cerevisiae</i>  | <i>matΔ::HygMX can1-100 his3-11 leu2-3,112 lys2- trp1-1 ura3-52 sir3Δ::KanMX</i>      | “                     |
| JRY9726  | <i>S. cerevisiae</i>  | <i>matΔ::HygMX can1-100 his3-11 leu2-3,112 lys2- trp1-1 ura3-52 sir4Δ::KanMX</i>      | “                     |
| JRY9727  | <i>S. cerevisiae</i>  | <i>matΔ::HygMX can1-100 his3-11 leu2-3,112 lys2- trp1-1 ura3-52 sir4Δ::KanMX</i>      | “                     |
| JRY9728  | <i>S. cerevisiae</i>  | <i>matΔ::HygMX can1-100 his3-11 leu2-3,112 lys2- trp1-1 ura3-52 sir4Δ::KanMX</i>      | “                     |
| JRY10156 | <i>T. delbrueckii</i> | <i>MATα ura3Δ0 trp3-1</i>                                                             |                       |
| JRY10157 | <i>T. delbrueckii</i> | <i>MATα ura3Δ0 trp3-1 kos3Δ::KanMX</i>                                                |                       |
| JRY10158 | <i>T. delbrueckii</i> | <i>MATα ura3Δ0 trp3-1 sir2Δ::KanMX</i>                                                |                       |
| JRY10159 | <i>T. delbrueckii</i> | <i>MATα ura3Δ0 trp3-1 sir4Δ::KanMX</i>                                                |                       |
| JRY10160 | <i>T. delbrueckii</i> | <i>MATα ura3Δ0 trp3-1 KOS3-3xV5-NatMX</i>                                             |                       |
| JRY10161 | <i>T. delbrueckii</i> | <i>MATα ura3Δ0 trp3-1 SIR2-3xV5-NatMX</i>                                             |                       |
| JRY10162 | <i>T. delbrueckii</i> | <i>MATα ura3Δ0 trp3-1 SIR4-3xV5-NatMX</i>                                             |                       |
| JRY10163 | <i>T. delbrueckii</i> | <i>MATα ura3Δ0 trp3-1 ago1Δ::NatMX</i>                                                |                       |

|          |                       |                                                                                   |  |
|----------|-----------------------|-----------------------------------------------------------------------------------|--|
| JRY10164 | <i>T. delbrueckii</i> | <i>MATα ura3Δ0 trp3-1 dcr1Δ::NatMX</i>                                            |  |
| JRY10165 | <i>T. delbrueckii</i> | <i>MATα ura3Δ0 trp3-1 ago1Δ::NatMX dcr1Δ::KanMX</i>                               |  |
| JRY10166 | <i>T. delbrueckii</i> | <i>MATα ura3Δ0 trp3-1 pRS41H-TdCEN3-hmlα2Δ::K. lactis URA3</i>                    |  |
| JRY10167 | <i>T. delbrueckii</i> | <i>MATα ura3Δ0 trp3-1 kos3Δ::NatMX [pRS41H-TdCEN3-hmlα2Δ::K. lactis URA3]</i>     |  |
| JRY10168 | <i>T. delbrueckii</i> | <i>MATα ura3Δ0 trp3-1 sir2Δ::NatMX [pRS41H-TdCEN3-hmlα2Δ::K. lactis URA3]</i>     |  |
| JRY10169 | <i>T. delbrueckii</i> | <i>MATα ura3Δ0 trp3-1 [pRS41H-TdCEN3-hmlα2Δ::K. lactis URA3] sir4Δ::NatMX</i>     |  |
| JRY10170 | <i>T. delbrueckii</i> | <i>MATα ura3Δ0 trp3-1 [pRS41H-TdCEN3]</i>                                         |  |
| JRY10173 | <i>T. delbrueckii</i> | <i>MATα ura3Δ0 trp3-1 [pRS41H-TdCEN3-hmlα2Δ::K. lactis URA3_regionEΔ]</i>         |  |
| JRY10174 | <i>T. delbrueckii</i> | <i>MATα ura3Δ0 trp3-1 [pRS41H-TdCEN3-hmlα2Δ::K. lactis URA3_rap1-site-mutant]</i> |  |
| JRY10175 | <i>T. delbrueckii</i> | <i>MATα ura3Δ0 trp3-1 [pRS41H-TdCEN3-hmra1Δ::K. lactis URA3]</i>                  |  |
| JRY10176 | <i>T. delbrueckii</i> | <i>MATα ura3Δ0 trp3-1 kos3Δ::NatMX [pRS41H-TdCEN3-hmra1Δ::K. lactis URA3]</i>     |  |
| JRY10177 | <i>T. delbrueckii</i> | <i>MATα ura3Δ0 trp3-1 sir2Δ::NatMX [pRS41H-TdCEN3-hmra1Δ::K. lactis URA3]</i>     |  |
| JRY10178 | <i>T. delbrueckii</i> | <i>MATα ura3Δ0 trp3-1 sir4Δ::NatMX [pRS41H-TdCEN3-hmra1Δ::K. lactis URA3]</i>     |  |
| JRY10179 | <i>T. delbrueckii</i> | <i>MATα ura3Δ0 trp3-1 [pRS41H-TdCEN3-hmra1Δ::K. lactis URA3_regionCΔ]</i>         |  |
| JRY10180 | <i>T. delbrueckii</i> | <i>MATα ura3Δ0 trp3-1 [pRS41H-TdCEN3-hmra1Δ::K. lactis URA3_regionAΔ]</i>         |  |
| JRY10181 | <i>T. delbrueckii</i> | <i>MATα ura3Δ0 trp3-1 [pRS41H-TdCEN3-hmra1Δ::K. lactis URA3_regionBΔ]</i>         |  |
| JRY10182 | <i>T. delbrueckii</i> | <i>MATα ura3Δ0 trp3-1 [pRS41H-TdCEN3-hmra1Δ::K. lactis URA3_rap1-siteΔ]</i>       |  |
| JRY10183 | <i>T. delbrueckii</i> | <i>MATα ura3Δ0 trp3-1 [pRS41H-TdCEN3-hmra1Δ::K. lactis URA3_rap1-site-mutant]</i> |  |
| JRY10184 | <i>T. delbrueckii</i> | <i>MATα ura3Δ0 trp3-1 kos3Δ::KanMX SIR2-3xV5-NatMX</i>                            |  |
| JRY10185 | <i>T. delbrueckii</i> | <i>MATα ura3Δ0 trp3-1 kos3Δ::KanMX SIR4-3xV5-NatMX</i>                            |  |
| JRY10207 | <i>T. delbrueckii</i> | <i>MAT@ uraΔ trp3(G466A) RAP1-3xV5-NAT</i>                                        |  |
| JRY10208 | <i>T. delbrueckii</i> | <i>MAT@ uraΔ trp3(G466A) [pRS41H-TdCEN3]</i>                                      |  |
| JRY10209 | <i>T. delbrueckii</i> | <i>MAT@ uraΔ trp3(G466A) sir2Δ::NAT [pRS41H-TdCEN3]</i>                           |  |
| JRY10210 | <i>T. delbrueckii</i> | <i>MAT@ uraΔ trp3(G466A) sir2Δ::NAT [pRS41H-TdCEN3]</i>                           |  |
| JRY10211 | <i>T. delbrueckii</i> | <i>MAT@ uraΔ trp3(G466A) kos3Δ::kan [pRS41H-TdCEN3-Td-KOS3]</i>                   |  |
| JRY10212 | <i>T. delbrueckii</i> | <i>MAT@ uraΔ trp3(G466A) kos3Δ::kan [pRS41H-TdCEN3-Td-KOS3]</i>                   |  |
| JRY10213 | <i>T. delbrueckii</i> | <i>MAT@ uraΔ trp3(G466A) kos3Δ::Kan sir2Δ::Nat [pRS41H-</i>                       |  |

|          |                       |                                                                             |  |
|----------|-----------------------|-----------------------------------------------------------------------------|--|
|          |                       | <i>TdCEN3-Td-KOS3</i>                                                       |  |
| JRY10214 | <i>T. delbrueckii</i> | <i>MAT@ uraΔ trp3(G466.A) kos3Δ::Kan sir2Δ::Nat [pRS41H-TdCEN3-Td-KOS3]</i> |  |

**Table S2 Genes Increasing and Decreasing in Expression in *sir1Δ***

Shown below is the list of genes that statistically significantly increased or decreased in expression by 2-fold or greater in the *sir1Δ* mutant relative to Wild type. Expression is shown in units of Fragments per Kilobase per Million reads (FPKM).

| Gene             | Systematic Name | Wild type FPKM | <i>sir1Δ</i> | Log <sub>2</sub> Fold-Change |
|------------------|-----------------|----------------|--------------|------------------------------|
| <i>HMR1</i>      | <i>YCR097W</i>  | 0.02           | 21.62        | Inf                          |
| <i>HMLALPHA1</i> | <i>YCL066W</i>  | 0              | 2.14         | Inf                          |
| <i>YCL065W</i>   | <i>YCL065W</i>  | 0              | 3.37015      | Inf                          |
| <i>HMLALPHA2</i> | <i>YCL067C</i>  | 0.02           | 11.17        | Inf                          |
| <i>FUS1</i>      | <i>YCL027W</i>  | 2.80           | 13.0         | 2.17                         |
| <i>HMX1</i>      | <i>YLR205C</i>  | 6.71           | 28.62        | 2.16                         |
| <i>YDR426C</i>   | <i>YDR426C</i>  | 3.95           | 12.82        | 2.02                         |
| <i>AGA1</i>      | <i>YNR044W</i>  | 18.81          | 75.23        | 2.01                         |
| <i>AGA2</i>      | <i>YGL032C</i>  | 87.78          | 300.10       | 1.76                         |
| <i>GPM2</i>      | <i>YDL021W</i>  | 6.54           | 17.01        | 1.39                         |
| <i>TMA10</i>     | <i>YLR327C</i>  | 48.23          | 99.15        | 1.28                         |
| <i>KAR4</i>      | <i>YCL055W</i>  | 12.85          | 30.56        | 1.27                         |
| <i>CYC7</i>      | <i>YEL039C</i>  | 11.21          | 25.88        | 1.22                         |
| <i>BAR1</i>      | <i>YIL015W</i>  | 44.74          | 101.48       | 1.19                         |
| <i>SPO11</i>     | <i>YHL022C</i>  | 0.99           | 2.81         | 1.19                         |
| <i>SCM4</i>      | <i>YGR049W</i>  | 51.79          | 110.81       | 1.16                         |
| <i>YNL155W</i>   | <i>YNL155W</i>  | 22.01          | 47.49        | 1.07                         |
| <i>STR3</i>      | <i>YGL184C</i>  | 11.73          | 24.72        | 1.07                         |
| <i>GPG1</i>      | <i>YGL121C</i>  | 22.92          | 46.69        | 1.02                         |
| <i>YLR413W</i>   | <i>YLR413W</i>  | 389.82         | 194.19       | -1.00                        |
| <i>PHO5</i>      | <i>YBR093C</i>  | 915.81         | 453.48       | -1.00                        |
| <i>PHO89</i>     | <i>YBR296C</i>  | 73.89          | 36.65        | -1.10                        |
| <i>ZRT1</i>      | <i>YGL255W</i>  | 389.91         | 184.98       | -1.10                        |
| <i>TOS6</i>      | <i>YNL300W</i>  | 340.12         | 172.12       | -1.10                        |
| <i>PHO12</i>     | <i>YHR215W</i>  | 400.97         | 151.36       | -1.34                        |
| <i>PHO11</i>     | <i>YAR071W</i>  | 244.35         | 81.25        | -1.66                        |

**Table S3 Genes Increasing and Decreasing in Expression Relative to Wild Type in *T. delbrueckii kos3Δ* Mutant**

Shown below are the two-fold or greater statistically significant expression changes that occurred in the *kos3Δ* mutant relative to Wild type.

| Gene Name   | Description/S.cerevisiae ortholog                                      | Wild Type Read Counts | Mutant Counts | Log <sub>2</sub> Fold-Change |
|-------------|------------------------------------------------------------------------|-----------------------|---------------|------------------------------|
| TDEL0E00330 | <i>silenced copy of a1 gene at T. delbrueckii HMR-2 locus</i>          | 0                     | 23.34         | inf                          |
| TDEL0B00100 | N/A                                                                    | 23.54                 | 5151.5        | 7.77                         |
| TDEL0G00190 | <i>silenced copy of a1 gene at T. delbrueckii HMR-1 locus</i>          | 0.3                   | 41.67         | 7.12                         |
| TDEL0H04540 | N/A                                                                    | 20.37                 | 1855.18       | 6.51                         |
| TDEL0B00110 | N/A                                                                    | 31.5                  | 2304.93       | 6.19                         |
| TDEL0E00340 | <i>silenced copy of a2 gene at T. delbrueckii HMR-2 locus</i>          | 0.56                  | 33.59         | 5.91                         |
| TDEL0H04510 | N/A                                                                    | 34.31                 | 650.35        | 4.24                         |
| TDEL0A08060 | N/A                                                                    | 19.43                 | 329.58        | 4.08                         |
| TDEL0C06910 | <i>Anc_1.12 YCL055W KAR4</i>                                           | 14.82                 | 103.18        | 2.8                          |
| TDEL0E00100 | N/A                                                                    | 66.67                 | 389.42        | 2.55                         |
| TDEL0A08040 | N/A                                                                    | 46.49                 | 269.21        | 2.53                         |
| TDEL0B07690 | N/A                                                                    | 240.6                 | 1216.89       | 2.34                         |
| TDEL0H04530 | N/A                                                                    | 358.29                | 1763.19       | 2.3                          |
| TDEL0H04520 | N/A                                                                    | 99.47                 | 464.31        | 2.22                         |
| TDEL0D00100 | N/A                                                                    | 33.22                 | 151.71        | 2.19                         |
| TDEL0C06990 | <i>additional copy of DIC1 in X region of T. delbrueckii HML locus</i> | 3.66                  | 15.83         | 2.11                         |
| TDEL0E00320 | N/A                                                                    | 44.16                 | 178.34        | 2.01                         |
| TDEL0E00110 | <i>Possible pseudogene</i>                                             | 52.84                 | 202.37        | 1.94                         |
| TDEL0A08050 | N/A                                                                    | 15.63                 | 59.74         | 1.93                         |
| TDEL0D06680 | N/A                                                                    | 31.31                 | 110.8         | 1.82                         |
| TDEL0E00270 | N/A                                                                    | 110.71                | 305.47        | 1.46                         |
| TDEL0E00310 | N/A                                                                    | 166.41                | 432.48        | 1.38                         |
| TDEL0E05490 | <i>Anc_6.240 YGL138C YGL138C</i>                                       | 9.42                  | 24.41         | 1.37                         |
| TDEL0D06610 | N/A                                                                    | 266.07                | 644.94        | 1.28                         |
| TDEL0A08020 | N/A                                                                    | 197.16                | 429.64        | 1.12                         |
| TDEL0A07280 | <i>Anc_6.313 YCR045C RRT12</i>                                         | 94.62                 | 205.37        | 1.12                         |
| TDEL0A07990 | <i>Anc_1.194 YKR066C CCP1</i>                                          | 424.18                | 876.8         | 1.05                         |
| TDEL0E00350 | <i>KOS3</i>                                                            | 187.66                | 2.46          | -6.25                        |

**Table S4 Genes Increasing and Decreasing in Expression Relative to Wild Type in *T. delbrueckii sir2Δ* mutant**

Shown below are statistically significant expression changes that occurred in the *sir2Δ* mutant relative to Wild type. GO term analysis revealed some genes that function in meiosis (\*) and carbohydrate metabolism (\*\*). Genes that specifically increased in only in the *sir2Δ* mutant and were located near a statistically significant Td-Sir2 peak are marked(‡).

| Tdel Gene Name | Description/S.cerevisiae ortholog                             | Wild type Read Counts | Mutant Counts | Log <sub>2</sub> Fold-Change |
|----------------|---------------------------------------------------------------|-----------------------|---------------|------------------------------|
| TDEL0E00330    | <i>silenced copy of a1 gene at T. delbrueckii HMR-2 locus</i> | 0                     | 30.34         | inf                          |

|                           |                                                                        |        |         |      |
|---------------------------|------------------------------------------------------------------------|--------|---------|------|
| TDEL0B00100               | N/A                                                                    | 28.56  | 5030.33 | 7.46 |
| TDEL0H04540               | N/A                                                                    | 24.73  | 3376.62 | 7.09 |
| TDEL0G00190               | <i>silenced copy of a1 gene at T. delbrueckii HMR-1 locus</i>          | 0.36   | 42.41   | 6.88 |
| TDEL0B00110               | N/A                                                                    | 38.16  | 2754.24 | 6.17 |
| TDEL0E05490               | <i>Anc_6.240 YGL138C</i><br>YGL138C                                    | 11.42  | 579.83  | 5.67 |
| TDEL0D03040               | N/A                                                                    | 6.42   | 275.89  | 5.43 |
| TDEL0E00340               | <i>silenced copy of a2 gene at T. delbrueckii HMR-2 locus</i>          | 0.67   | 27.74   | 5.36 |
| TDEL0H03220 <sup>‡</sup>  | N/A                                                                    | 21.89  | 573.92  | 4.71 |
| TDEL0C02460 <sup>‡</sup>  | <i>Anc_7.301 YDL186W</i><br>YDL186W                                    | 6.76   | 159.44  | 4.56 |
| TDEL0H04510               | N/A                                                                    | 41.63  | 830.98  | 4.32 |
| TDEL0A03570* <sup>‡</sup> | <i>Anc_5.493 YDR402C DIT2</i>                                          | 66.44  | 1280.49 | 4.27 |
| TDEL0A05800* <sup>‡</sup> | <i>Anc_8.634 YPL130W</i><br>SPO19 YOR214C<br>YOR214C                   | 326.1  | 4960.5  | 3.93 |
| TDEL0A08060               | N/A                                                                    | 23.54  | 355.85  | 3.92 |
| TDEL0D02390               | N/A                                                                    | 7.06   | 105.6   | 3.9  |
| TDEL0G02080 <sup>‡</sup>  | <i>Anc_1.169 YJL170C ASG7</i>                                          | 11.47  | 124.36  | 3.44 |
| TDEL0B07690               | N/A                                                                    | 291.82 | 3152.53 | 3.43 |
| TDEL0C06230 <sup>‡</sup>  | <i>Anc_1.78</i>                                                        | 21.03  | 196.88  | 3.23 |
| TDEL0G00740 <sup>‡</sup>  | <i>Anc_5.50 YGR260W</i><br>TNA1                                        | 760.16 | 6641.08 | 3.13 |
| TDEL0A03580* <sup>‡</sup> | <i>Anc_5.494 YDR403W</i><br>DIT1*                                      | 305.27 | 2584.58 | 3.08 |
| TDEL0C06910               | <i>Anc_1.12 YCL055W KAR4</i>                                           | 18     | 145.73  | 3.02 |
| TDEL0A00420 <sup>‡</sup>  | <i>Anc_3.23 YNL318C</i><br>HXT14                                       | 63.73  | 494.54  | 2.96 |
| TDEL0G01600 <sup>‡</sup>  | <i>Anc_6.185 YGL089C</i><br>MF(ALPHA)2 YPL187W<br>MF(ALPHA)1           | 39.76  | 297.07  | 2.9  |
| TDEL0D02770* <sup>‡</sup> | <i>Anc_4.174 YLR343W</i><br>GAS2                                       | 45.12  | 315.62  | 2.81 |
| TDEL0A06450*              | <i>Anc_8.700 YOR255W</i><br>OSW1                                       | 35.61  | 247.62  | 2.8  |
| TDEL0B03880               | N/A                                                                    | 62.55  | 431.69  | 2.79 |
| TDEL0E00100               | <i>probable pseudogene</i>                                             | 80.85  | 540.34  | 2.74 |
| TDEL0A00530*              | <i>Anc_3.34 YOL132W</i><br>GAS4                                        | 85.16  | 547.68  | 2.69 |
| TDEL0H04530               | N/A                                                                    | 434.83 | 2760.86 | 2.67 |
| TDEL0C06990               | <i>additional copy of DIC1 in X region of T. delbrueckii HML locus</i> | 4.44   | 27.27   | 2.62 |
| TDEL0H04520               | N/A                                                                    | 120.74 | 717.27  | 2.57 |
| TDEL0D02810* <sup>‡</sup> | <i>Anc_4.171 YLR341W</i><br>SPO77                                      | 69.47  | 405.68  | 2.55 |
| TDEL0D04700               | <i>Anc_3.152 YOL067C</i><br>RTG1                                       | 110.74 | 633.36  | 2.52 |
| TDEL0A05130* <sup>‡</sup> | <i>Anc_8.570 YBR180W</i><br>DTR1                                       | 62.24  | 352.79  | 2.5  |
| TDEL0D00830               | <i>Anc_4.335</i>                                                       | 109.78 | 619.08  | 2.5  |
| TDEL0A04250               | YBR298C MAL31                                                          | 368.48 | 2063.52 | 2.49 |

|               |                                                |         |          |      |
|---------------|------------------------------------------------|---------|----------|------|
| TDEL0G03030   | <i>Anc_2.371 YPL033C SRL4</i>                  | 52.91   | 295.22   | 2.48 |
| TDEL0E01490** | <i>Anc_4.223 YDL049C<br/>KNH1</i>              | 99.52   | 518.7    | 2.38 |
| TDEL0G00780*‡ | <i>Anc_5.54 YHR184W SSP1</i>                   | 176.73  | 918.42   | 2.38 |
| TDEL0D00100   | <i>N/A</i>                                     | 40.36   | 209.06   | 2.37 |
| TDEL0B03420*‡ | <i>Anc_8.768 YOR298W<br/>MUM3</i>              | 60.68   | 306.94   | 2.34 |
| TDEL0E00260   | <i>N/A</i>                                     | 2566.61 | 12859.78 | 2.32 |
| TDEL0H03650   | <i>N/A</i>                                     | 97.84   | 483.86   | 2.31 |
| TDEL0C06770*‡ | <i>Anc_1.25 YCL048W<br/>SPS22 YDR522C SPS2</i> | 121.68  | 595.33   | 2.29 |
| TDEL0B07410‡  | <i>N/A</i>                                     | 37.16   | 178.54   | 2.26 |
| TDEL0H03270‡  | <i>N/A</i>                                     | 422.23  | 1923.48  | 2.19 |
| TDEL0B01080*‡ | <i>Anc_8.790 YOR313C SPS4</i>                  | 75.47   | 330.11   | 2.13 |
| TDEL0C01450   | <i>Anc_7.402 YER106W<br/>MAM1</i>              | 85.7    | 374.03   | 2.13 |
| TDEL0H02150‡  | <i>Anc_7.229 YER053C-A<br/>YER053C-A</i>       | 278.61  | 1212.99  | 2.12 |
| TDEL0A07280   | <i>Anc_6.313 YCR045C<br/>RRT12</i>             | 114.78  | 495.69   | 2.11 |
| TDEL0A02610*  | <i>Anc_2.485 YKL096W<br/>CWPI*</i>             | 418.19  | 1720.12  | 2.04 |
| TDEL0D01720‡  | <i>N/A</i>                                     | 148.46  | 589.36   | 1.99 |
| TDEL0A06900   | <i>Anc_6.277 YMR189W<br/>GCV2</i>              | 5122.21 | 20210.34 | 1.98 |
| TDEL0H00530   | <i>N/A</i>                                     | 491.32  | 1927.45  | 1.97 |
| TDEL0H02590‡  | <i>Anc_7.188 YFR032C RRT5</i>                  | 59.24   | 229.4    | 1.95 |
| TDEL0D06570‡  | <i>N/A</i>                                     | 984.99  | 3787.33  | 1.94 |
| TDEL0G02530‡  | <i>Anc_2.323 YDL114W<br/>YDL114W</i>           | 76.26   | 289.63   | 1.93 |
| TDEL0A08040   | <i>N/A</i>                                     | 56.36   | 211.62   | 1.91 |
| TDEL0C00760*  | <i>Anc_8.50 YLR054C OSW2</i>                   | 222.35  | 818.13   | 1.88 |
| TDEL0D03790   | <i>Anc_3.246 YDR019C<br/>GCV1</i>              | 1394.09 | 5092.1   | 1.87 |
| TDEL0F00170   | <i>N/A</i>                                     | 514.16  | 1840.41  | 1.84 |
| TDEL0D04720‡  | <i>Anc_3.150 YDL043C<br/>PRP11</i>             | 169.35  | 603.95   | 1.83 |
| TDEL0B06100‡  | <i>Anc_1.396 YLR174W<br/>IDP2 YNL009W IDP3</i> | 1408.31 | 5002.87  | 1.83 |
| TDEL0A05020   | <i>Anc_5.636 YDR270W<br/>CCC2</i>              | 651.52  | 2274.87  | 1.8  |
| TDEL0A07980   | <i>N/A</i>                                     | 278.86  | 972.97   | 1.8  |
| TDEL0A02410‡  | <i>Anc_2.465 YMR096W<br/>SNZ1</i>              | 1800.5  | 6156.83  | 1.77 |
| TDEL0A02420   | <i>Anc_2.466 YMR095C<br/>SNO1</i>              | 383.86  | 1300.79  | 1.76 |
| TDEL0C00160   | <i>N/A</i>                                     | 38.7    | 121.52   | 1.65 |
| TDEL0B01290   | <i>Anc_8.508 YBR157C ICS2</i>                  | 16.04   | 50.17    | 1.64 |
| TDEL0G04960   | <i>no start codon apparent</i>                 | 2339.73 | 7093.07  | 1.6  |
| TDEL0D02340‡  | <i>N/A</i>                                     | 316.47  | 953.87   | 1.59 |
| TDEL0B06220‡  | <i>Anc_1.385</i>                               | 127.12  | 380.25   | 1.58 |
| TDEL0G00100   | <i>N/A</i>                                     | 401.9   | 1199.81  | 1.58 |
| TDEL0E01760   | <i>Anc_4.197 YLR359W</i>                       | 4490.51 | 13391.34 | 1.58 |

|                            |                                                        |         |          |      |
|----------------------------|--------------------------------------------------------|---------|----------|------|
|                            | <i>ADE13</i>                                           |         |          |      |
| TDEL0D05600 <sup>‡</sup>   | <i>Anc_3.492 YGR130C</i><br>YGR130C                    | 2352.85 | 6992.01  | 1.57 |
| TDEL0D06680                | N/A                                                    | 38.03   | 112.78   | 1.57 |
| TDEL0D05330 <sup>‡</sup>   | N/A                                                    | 104.35  | 308.51   | 1.56 |
| TDEL0E02790 <sup>‡</sup>   | <i>Anc_5.348 YDR317W</i><br>HIM1                       | 64.76   | 191.21   | 1.56 |
| TDEL0E04950                | <i>Anc_5.134 YGR204W</i><br>ADE3                       | 3636.91 | 10599.18 | 1.54 |
| TDEL0A00960* <sup>‡</sup>  | <i>Anc_2.55 YDL222C</i><br>FMP45 YNL194C<br>YNL194C    | 1683.93 | 4875.4   | 1.53 |
| TDEL0A02500 <sup>‡</sup>   | <i>Anc_2.474 YMR087W</i><br>YMR087W                    | 201.34  | 579.65   | 1.53 |
| TDEL0G00760* <sup>‡</sup>  | <i>Anc_5.52 YHR185C PFS1</i>                           | 196     | 563.98   | 1.52 |
| TDEL0D05160 <sup>‡</sup>   | <i>Anc_3.108 YBR149W</i><br>ARA1                       | 1852.55 | 5329.9   | 1.52 |
| TDEL0C05600 <sup>‡</sup>   | <i>Anc_3.424 YGR088W</i><br>CTT1                       | 6793.72 | 19384.26 | 1.51 |
| TDEL0H04480 <sup>‡</sup>   | N/A                                                    | 7320.05 | 20813.2  | 1.51 |
| TDEL0G01610 <sup>‡</sup>   | <i>Anc_6.184 YPL186C UIP4</i>                          | 136.95  | 389.23   | 1.51 |
| TDEL0B06310** <sup>‡</sup> | <i>Anc_1.375 YFR015C</i><br>GSY1 YLR258W GSY2          | 1267.26 | 3569.67  | 1.49 |
| TDEL0H03660                | N/A                                                    | 37.04   | 102.96   | 1.47 |
| TDEL0A08050                | N/A                                                    | 18.95   | 51.66    | 1.45 |
| TDEL0C01830 <sup>‡</sup>   | N/A                                                    | 1567.76 | 4262.27  | 1.44 |
| TDEL0B05440                | N/A                                                    | 45.96   | 124.44   | 1.44 |
| TDEL0C00840                | <i>Anc_8.58 YFL017C GNA1</i>                           | 340.96  | 906.62   | 1.41 |
| TDEL0C04590* <sup>‡</sup>  | <i>Anc_2.242 YNL065W</i><br>AQR1 YIL120W QDR1          | 1794.04 | 4734.42  | 1.4  |
| TDEL0C00630                | <i>Anc_8.38 YLR058C SHM2</i>                           | 8025.37 | 20980.43 | 1.39 |
| TDEL0C00170                | <i>Anc_2.89 YNL165W</i><br>YNL165W                     | 43.18   | 112.8    | 1.39 |
| TDEL0C02500 <sup>‡</sup>   | <i>Anc_1.489 YEL046C</i><br>GLY1                       | 3378.27 | 8801.43  | 1.38 |
| TDEL0E00310                | N/A                                                    | 202     | 522.53   | 1.37 |
| TDEL0A00140                | N/A                                                    | 109.36  | 282.47   | 1.37 |
| TDEL0E00350                | N/A                                                    | 227.73  | 587.63   | 1.37 |
| TDEL0G00210                | N/A                                                    | 449.42  | 1158.59  | 1.37 |
| TDEL0E00850 <sup>‡</sup>   | <i>Anc_4.285 YKL187C</i><br>YKL187C YLR413W<br>YLR413W | 2873.13 | 7339.53  | 1.35 |
| TDEL0B05780 <sup>‡</sup>   | N/A                                                    | 102.69  | 260.58   | 1.34 |
| TDEL0D05040 <sup>‡</sup>   | <i>Anc_3.119 YOL084W</i><br>PHM7                       | 5727.35 | 14415.9  | 1.33 |
| TDEL0E00320                | N/A                                                    | 53.58   | 133.94   | 1.32 |
| TDEL0A05760 <sup>‡</sup>   | <i>Anc_8.630 YPL128C TBF1</i>                          | 139.06  | 346.38   | 1.32 |
| TDEL0H00120                | N/A                                                    | 90.65   | 222.93   | 1.3  |
| TDEL0D05750 <sup>‡</sup>   | <i>Anc_3.507</i>                                       | 495.87  | 1215.55  | 1.29 |
| TDEL0C00210 <sup>‡</sup>   | N/A                                                    | 641.94  | 1543.38  | 1.27 |
| TDEL0D03430 <sup>‡</sup>   | <i>Anc_3.281 YBR066C</i><br>NRG2 YDR043C NRG1          | 300.95  | 717.87   | 1.25 |
| TDEL0C04620 <sup>‡</sup>   | <i>Anc_2.245 YNL063W</i>                               | 416.43  | 983      | 1.24 |



|                | <i>MTQ1</i>                                                           |          |          |      |
|----------------|-----------------------------------------------------------------------|----------|----------|------|
| TDEL0B04150**‡ | <i>Anc_8.195 YDR074W</i><br>TPS2                                      | 2150.3   | 5060.38  | 1.23 |
| TDEL0B02500    | <i>Anc_5.673 YKR080W</i><br>MTD1                                      | 2761.04  | 6492.77  | 1.23 |
| TDEL0D06610    | <i>possible pseudogene; N added at two sites to avoid frameshifts</i> | 322.84   | 758.48   | 1.23 |
| TDEL0E00110    | <i>possible pseudogene; N added to avoid frameshift</i>               | 64.14    | 149.43   | 1.22 |
| TDEL0E00270    | N/A                                                                   | 134.39   | 312.28   | 1.22 |
| TDEL0F01320    | <i>Anc_2.177 YNL101W</i><br>AVT4                                      | 1132.4   | 2618.17  | 1.21 |
| TDEL0D05430    | <i>Anc_3.81 YNL280C</i><br>ERG24                                      | 1549.78  | 3578.89  | 1.21 |
| TDEL0E03600‡   | <i>Anc_5.266 YHR022C</i><br>YHR022C                                   | 839.36   | 1936.88  | 1.21 |
| TDEL0F03380    | N/A                                                                   | 54.95    | 126.65   | 1.2  |
| TDEL0D00650‡   | N/A                                                                   | 389.91   | 880.46   | 1.18 |
| TDEL0C01310‡   | N/A                                                                   | 2145.74  | 4806.19  | 1.16 |
| TDEL0G01510    | <i>Anc_6.195 YGL082W</i><br>YGL082W YPL191C<br>YPL191C                | 407.25   | 908.44   | 1.16 |
| TDEL0A07230    | <i>Anc_6.309</i><br>YMR206W/YNR014W                                   | 518.47   | 1152.23  | 1.15 |
| TDEL0B00120    | N/A                                                                   | 169.29   | 374.84   | 1.15 |
| TDEL0H01710    | <i>Anc_7.273 YER081W</i><br>SER3 YIL074C SER33                        | 6936.33  | 15341.48 | 1.15 |
| TDEL0B00960‡   | <i>Anc_8.801 YMR250W</i><br>GAD1                                      | 953.92   | 2108.67  | 1.14 |
| TDEL0B05680**  | <i>Anc_1.435 YEL011W</i><br>GLC3                                      | 809.34   | 1762.59  | 1.12 |
| TDEL0C00140    | N/A                                                                   | 85.09    | 184.53   | 1.12 |
| TDEL0D02250    | <i>Anc_1.357 YFR023W</i><br>PES4 YHR015W MIP6                         | 308.62   | 668.74   | 1.12 |
| TDEL0G01710    | <i>Anc_4.20 YHL028W</i><br>WSC4                                       | 695.11   | 1506.14  | 1.12 |
| TDEL0D02460    | <i>Anc_5.455 YOR128C</i><br>ADE2                                      | 2232     | 4829.7   | 1.11 |
| TDEL0E00280    | N/A                                                                   | 376.24   | 806.8    | 1.1  |
| TDEL0B03240    | <i>Anc_8.525 YPL061W</i><br>ALD6                                      | 994.1    | 2127.76  | 1.1  |
| TDEL0C02550‡   | <i>Anc_1.484 YEL041W</i><br>YEF1 YJR049C UTR1                         | 690.63   | 1476.64  | 1.1  |
| TDEL0H04260    | <i>Anc_7.25 YAL044C</i><br>GCV3                                       | 2743.83  | 5814.64  | 1.08 |
| TDEL0C05340‡   | <i>Anc_3.397 YBR132C</i><br>AGP2                                      | 596.01   | 1262.57  | 1.08 |
| TDEL0C05240**‡ | <i>Anc_3.386 YBR126C</i> TPS1                                         | 2205.2   | 4663.53  | 1.08 |
| TDEL0C00450‡   | <i>Anc_8.22 YFL040W</i><br>YFL040W                                    | 80.29    | 169.32   | 1.08 |
| TDEL0A02400‡   | <i>Anc_2.464 YKL109W</i><br>HAP4                                      | 1447.85  | 3053.05  | 1.08 |
| TDEL0G00200    | <i>silenced copy of a2 gene at T. delbrueckii HMR-1 locus</i>         | 80.13    | 168.35   | 1.07 |
| TDEL0E03690**‡ | <i>Anc_5.257 YKL152C</i>                                              | 53511.14 | 111819.2 | 1.06 |

|               |                                                       |          |         |       |
|---------------|-------------------------------------------------------|----------|---------|-------|
|               | <i>GPM1</i>                                           |          |         |       |
| TDEL0C00130   | N/A                                                   | 718.82   | 1499.25 | 1.06  |
| TDEL0D03730*† | <i>Anc_3.252 YBR045C GIP1</i>                         | 180.07   | 372.7   | 1.05  |
| TDEL0D03300‡  | <i>Anc_3.296</i>                                      | 3786.42  | 7762.59 | 1.04  |
| TDEL0A00130   | N/A                                                   | 312.57   | 639.12  | 1.03  |
| TDEL0H02310   | <i>Anc_7.215 YER047C<br/>SAP1</i>                     | 463.53   | 947.02  | 1.03  |
| TDEL0E00210** | <i>Anc_2.445 YKL127W<br/>PGM1 YMR105C PGM2</i>        | 7533.93  | 15266.2 | 1.02  |
| TDEL0G03220*† | <i>Anc_2.391 YDL079C<br/>MRK1 YMR139W RIM11</i>       | 1715.92  | 3476.54 | 1.02  |
| TDEL0C03290   | <i>Anc_7.465 YJR094C IME1</i>                         | 31.65    | 64.13   | 1.02  |
| TDEL0B00340   | <i>Anc_8.865 YML091C<br/>RPM2</i>                     | 2336.03  | 4731.25 | 1.02  |
| TDEL0B00830   | <i>Anc_8.814 YMR262W<br/>YMR262W</i>                  | 412.6    | 834.55  | 1.02  |
| TDEL0A02430   | <i>Anc_2.467 YMR094W<br/>CTF13</i>                    | 103.45   | 208.01  | 1.01  |
| TDEL0D01220‡  | <i>Anc_1.255 YJL106W<br/>IME2</i>                     | 86.48    | 173.31  | 1     |
| TDEL0D04710   | <i>Anc_3.151 YDL042C SIR2<br/>YOL068C HST1</i>        | 1073.99  | 9.22    | -6.86 |
| TDEL0D06630   | <i>YFR055W IRC7</i>                                   | 1735.47  | 356.24  | -2.28 |
| TDEL0F02930   | <i>Anc_4.59 YGR161C RTS3</i>                          | 3158.93  | 941.4   | -1.75 |
| TDEL0H00860   | <i>YGR286C BIO2</i>                                   | 526.47   | 185.53  | -1.5  |
| TDEL0F04600   | <i>Anc_8.336 YDR155C<br/>CPR1</i>                     | 10592.71 | 3790.99 | -1.48 |
| TDEL0G03300   | N/A                                                   | 869.19   | 319.86  | -1.44 |
| TDEL0B04040   | <i>Anc_6.150 YBR238C<br/>YBR238C YGL107C<br/>RMD9</i> | 5774.79  | 2164.77 | -1.42 |
| TDEL0C02270   | <i>Anc_7.319 YLR214W<br/>FRE1</i>                     | 8103.25  | 3287.34 | -1.3  |
| TDEL0H02760   | <i>Anc_7.169</i>                                      | 136.54   | 58.79   | -1.22 |
| TDEL0C01030   | N/A                                                   | 2182.98  | 941.75  | -1.21 |
| TDEL0E03870   | <i>Anc_5.239 YJL034W<br/>KAR2</i>                     | 6060.81  | 2660.19 | -1.19 |
| TDEL0E02290   | <i>Anc_5.395 YDR343C<br/>HXT6 YHR094C HXT1</i>        | 2305.49  | 1013    | -1.19 |
| TDEL0F05620   | <i>YKL216W URA1</i>                                   | 2366.8   | 1054.72 | -1.17 |
| TDEL0B04210   | <i>Anc_8.189 YDR070C<br/>FMP16</i>                    | 681.14   | 311.42  | -1.13 |
| TDEL0F01940   | <i>Anc_6.244 YMR173W<br/>DDR48</i>                    | 3659.39  | 1681.12 | -1.12 |
| TDEL0B02690   | <i>Anc_5.654 YKR071C<br/>DRE2</i>                     | 921.33   | 425.21  | -1.12 |
| TDEL0B01220   | <i>Anc_8.516 YBR162W-A<br/>YSY6</i>                   | 532.41   | 253.33  | -1.07 |
| TDEL0G04350   | <i>Anc_6.34 YMR002W<br/>MIC17</i>                     | 792.64   | 378.4   | -1.07 |
| TDEL0H01600   | N/A                                                   | 1848.38  | 892.09  | -1.05 |
| TDEL0F00720   | <i>Anc_2.84 YHR144C DCD1</i>                          | 262.29   | 129.14  | -1.02 |
| TDEL0A01990   | <i>Anc_4.186 YGR041W<br/>BUD9 YLR353W BUD8</i>        | 394.24   | 195.73  | -1.01 |
| TDEL0B00270   | <i>Anc_8.858 YML123C</i>                              | 7365.58  | 3679.29 | -1    |

|  |       |  |  |  |
|--|-------|--|--|--|
|  | PHO84 |  |  |  |
|--|-------|--|--|--|

**Table S5 Genes Increasing and Decreasing in Expression Relative to Wild Type in *T. delbrueckii sir4Δ* Mutant**

Shown below are the two-fold or greater statistically significant expression changes that occurred in the *sir4Δ* mutant relative to Wild type.

| Tdel Gene Name | Description/S.cerevisiae ortholog                                              | Wild type Read Counts | Mutant Counts | Log <sub>2</sub> Fold-Change |
|----------------|--------------------------------------------------------------------------------|-----------------------|---------------|------------------------------|
| TDEL0E00330    | <i>silenced copy of a1 gene at T. delbrueckii HMR-2 locus</i>                  | 0                     | 32.67         | inf                          |
| TDEL0B00100    | N/A                                                                            | 31.67                 | 8351.03       | 8.04                         |
| TDEL0G00190    | <i>silenced copy of a1 gene at T. delbrueckii HMR-1 locus</i>                  | 0.4                   | 63.04         | 7.3                          |
| TDEL0H04540    | N/A                                                                            | 27.41                 | 1842.8        | 6.07                         |
| TDEL0B00110    | N/A                                                                            | 42.34                 | 2713.53       | 6                            |
| TDEL0E00340    | <i>silenced copy of a2 gene at T. delbrueckii HMR-2 locus</i>                  | 0.75                  | 38.91         | 5.7                          |
| TDEL0H04510    | N/A                                                                            | 46.16                 | 745.75        | 4.01                         |
| TDEL0A08060    | N/A                                                                            | 26.12                 | 401.23        | 3.94                         |
| TDEL0B07690    | N/A                                                                            | 323.59                | 2190.76       | 2.76                         |
| TDEL0C06990    | <i>additional copy of DIC1 in X region of T. delbrueckii HML locus</i>         | 4.92                  | 29.95         | 2.61                         |
| TDEL0E00100    | <i>probable pseudogene; NNN added at 2 sites to avoid internal stop codons</i> | 89.67                 | 518.29        | 2.53                         |
| TDEL0C06910    | <i>Anc_1.12 YCL055W KAR4</i>                                                   | 19.95                 | 101.29        | 2.34                         |
| TDEL0D00100    | N/A                                                                            | 44.73                 | 214.92        | 2.26                         |
| TDEL0H04530    | N/A                                                                            | 482.14                | 2313.94       | 2.26                         |
| TDEL0H04520    | N/A                                                                            | 133.86                | 606.11        | 2.18                         |
| TDEL0A08040    | N/A                                                                            | 62.52                 | 273.11        | 2.13                         |
| TDEL0A08050    | N/A                                                                            | 21.02                 | 75.4          | 1.84                         |
| TDEL0E00320    | N/A                                                                            | 59.4                  | 204.09        | 1.78                         |
| TDEL0D06680    | N/A                                                                            | 42.15                 | 144.07        | 1.77                         |
| TDEL0E00310    | N/A                                                                            | 223.93                | 716.54        | 1.68                         |
| TDEL0E00110    | <i>possible pseudogene; N added to avoid frameshift</i>                        | 71.11                 | 213.67        | 1.59                         |
| TDEL0G00100    | N/A                                                                            | 445.66                | 1243.04       | 1.48                         |
| TDEL0E00350    | N/A                                                                            | 252.49                | 659.05        | 1.38                         |
| TDEL0D06610    | <i>possible pseudogene; N added at two sites to avoid frameshifts</i>          | 357.97                | 842.67        | 1.24                         |
| TDEL0B00120    | N/A                                                                            | 187.69                | 426.62        | 1.18                         |
| TDEL0E00260    | N/A                                                                            | 2845.36               | 6178.25       | 1.12                         |
| TDEL0C00100    | N/A                                                                            | 58.85                 | 120.26        | 1.03                         |
| TDEL0B01940    | <i>Anc_8.442 YDR227W SIR4</i>                                                  | 775.97                | 1.07          | -9.5                         |

**Table S6 Genes Increasing and Decreasing in Expression Relative to Wild Type in *T. delbrueckii ago1Δ* Mutant**

| Tdel Gene Name | Description/S.cerevisiae ortholog             | Wild type Read Counts | Mutant Counts | Log <sub>2</sub> Fold-Change |
|----------------|-----------------------------------------------|-----------------------|---------------|------------------------------|
| TDEL0E05620    | <i>Anc_4.53_YLR303W_MET17</i>                 | 1282.81               | 2605.93       | 1.02                         |
| TDEL0D03430    | <i>Anc_3.281_YBR066C_NRG2_YDR043C_NRG1</i>    | 313.05                | 686.07        | 1.13                         |
| TDEL0C00130    | <i>None</i>                                   | 747.86                | 1511.21       | 1.01                         |
| TDEL0A00960    | <i>Anc_2.55_YDL222C_FMP45_YNL194C_YNL194C</i> | 1753.09               | 3807.72       | 1.12                         |
| TDEL0G04020    | <i>Anc_6.70_YLR273C_PIG1_YOR178C_GAC1</i>     | 782.76                | 1570.67       | 1                            |
| TDEL0H04480    | <i>None</i>                                   | 7605.79               | 16321.03      | 1.1                          |
| TDEL0D00760    | <i>AGO1</i>                                   | 4105.13               | 18.85         | -7.77                        |
| TDEL0D00160    | <i>None</i>                                   | 2316.09               | 1132.09       | -1.03                        |
| TDEL0H00100    | <i>None</i>                                   | 180.65                | 89.78         | -1.01                        |
| TDEL0B00270    | <i>Anc_8.858_YML123C_PHO84</i>                | 7680.71               | 3103.39       | -1.31                        |
| TDEL0F05620    | <i>YKL216W_UR1</i>                            | 2471.09               | 1104.82       | -1.16                        |
| TDEL0E03110    | <i>Anc_5.316_YDR299W_BFR2</i>                 | 848.82                | 367.55        | -1.21                        |
| TDEL0E00130    | <i>Anc_3.217_YBR018C_GAL7</i>                 | 5447.66               | 1847.84       | -1.56                        |
| TDEL0B06990    | <i>Anc_2.606_YKL067W_YNK1</i>                 | 1149.35               | 551.91        | -1.06                        |
| TDEL0A08040    | <i>None</i>                                   | 58.8                  | 27.88         | -1.08                        |

**Table S7 Genes Increasing and Decreasing in Expression Relative to Wild Type in *T. delbrueckii dcr1*Δ Mutant**

| Tdel Gene Name | Description/S.cerevisiae ortholog          | Wild type Counts | Mutant Counts | Log <sub>2</sub> Fold-Change |
|----------------|--------------------------------------------|------------------|---------------|------------------------------|
| TDEL0E05620    | <i>YLR303W (MET17)</i>                     | 1282.81          | 2919.77       | 1.19                         |
| TDEL0B07040    | <i>YKL068W-A</i>                           | 115.16           | 253.29        | 1.14                         |
| TDEL0D03430    | <i>Anc_3.281_YBR066C_NRG2_YDR043C_NRG1</i> | 313.05           | 640.28        | 1.03                         |
| TDEL0D03620    | <i>Anc_3.263_YBR054W_YRO2_YDR033W_MRH1</i> | 1143.57          | 2645.5        | 1.21                         |
| TDEL0B00490    | <i>TdDCR1</i>                              | 527.95           | 0.49          | -10.09                       |
| TDEL0D00150    | <i>None</i>                                | 2483.46          | 1224.75       | -1.02                        |
| TDEL0D00160    | <i>None</i>                                | 2316.09          | 1156.62       | -1                           |
| TDEL0B00270    | <i>Anc_8.858_YML123C_PHO84</i>             | 7680.71          | 3726.61       | -1.04                        |
| TDEL0E00130    | <i>Anc_3.217_YBR018C_GAL7</i>              | 5447.66          | 1831.02       | -1.57                        |

**Table S8 Genes Increasing and Decreasing in Expression Relative to Wild Type in *T. delbrueckii ago1*Δ*dcr1*Δ Mutant**

A total of 15 genes increased in expression, while 36 genes decreased in expression (excluding *AGO1* and *DCR1* themselves, which were deleted). Statistically significant associated GO terms are starred: \*oxidation-reduction process and \*\*small molecule metabolism.

| Tdel Gene Name | Description/S.cerevisiae ortholog           | Wild type Counts | Mutant Counts | Log <sub>2</sub> Fold-Change |
|----------------|---------------------------------------------|------------------|---------------|------------------------------|
| TDEL0D05180    | <i>Anc_3.106_YOL091W_SPO21_YBR148W_YSW1</i> | 315.93           | 818.69        | 1.37                         |
| TDEL0H02150    | <i>Anc_7.229_YER053C-A_YER053C-A</i>        | 290.62           | 638.93        | 1.14                         |

|                  |                                                                                           |         |         |       |
|------------------|-------------------------------------------------------------------------------------------|---------|---------|-------|
| TDEL0E05620**    | <i>Anc_4.53_YLR303W_MET17</i>                                                             | 1282.81 | 3371.21 | 1.39  |
| TDEL0A02860**,** | <i>Anc_2.510_YKL001C_MET14</i>                                                            | 500.72  | 1049.28 | 1.07  |
| TDEL0B07040      | <i>Anc_2.611_YKL068W-A_YKL068W-A</i>                                                      | 115.16  | 293.26  | 1.35  |
| TDEL0C02250      | <i>Anc_7.321_YLR213C_CRR1</i>                                                             | 393.95  | 872.25  | 1.15  |
| TDEL0H00530      | <i>None</i>                                                                               | 511.71  | 1924.72 | 1.91  |
| TDEL0A03070**    | <i>Anc_2.533_YMR070W_MOT3</i>                                                             | 531.53  | 1184.55 | 1.16  |
| TDEL0D02810      | <i>Anc_4.171_YLR341W_SPO77</i>                                                            | 72.41   | 165.49  | 1.19  |
| TDEL0G04810      | <i>Anc_5.225_YJR004C_possible_pseudogene;_NNN_added_to_avoid_internal_stop_codon_SAG1</i> | 2856.36 | 8065.96 | 1.5   |
| TDEL0H02590      | <i>Anc_7.188_YFR032C_RRT5</i>                                                             | 61.8    | 177.97  | 1.53  |
| TDEL0B03030**    | <i>Anc_8.543_YPL075W_GCR1</i>                                                             | 3043.67 | 6173.95 | 1.02  |
| TDEL0H03220      | <i>None</i>                                                                               | 22.84   | 50.38   | 1.14  |
| TDEL0E01150      | <i>Anc_4.255_YLR394W_CST9</i>                                                             | 151.86  | 386.56  | 1.35  |
| TDEL0F02030      | <i>Anc_3.314_YBL029W_YBL029W</i>                                                          | 1882.73 | 5733.91 | 1.61  |
| TDEL0D00760      | <i>DCR1</i>                                                                               | 4105.13 | 15.95   | -8.01 |
| TDEL0B00490      | <i>AGO1</i>                                                                               | 527.95  | 0.93    | -9.15 |
| TDEL0F04930      | <i>Anc_8.369_YDR171W_HSP42</i>                                                            | 2110.06 | 942.43  | -1.16 |
| TDEL0C06700**    | <i>Anc_1.33_YCL040W_GLK1_YDR516C_EMI2</i>                                                 | 5278.83 | 2026.37 | -1.38 |
| TDEL0C03660      | <i>Anc_1.187_YJL160C_YJL160C_YKL164C_PIR1</i>                                             | 9328.27 | 4467.78 | -1.06 |
| TDEL0C03310      | <i>Anc_7.467_YJR095W_SFC1</i>                                                             | 760.01  | 293.07  | -1.37 |
| TDEL0A07760**    | <i>Anc_6.361_YNR041C_COQ2</i>                                                             | 1513.9  | 745.09  | -1.02 |
| TDEL0B06100**,** | <i>Anc_1.396_YLR174W_IDP2_YNL009W_IDP3</i>                                                | 1468.89 | 674.28  | -1.12 |
| TDEL0A08000      | <i>None</i>                                                                               | 1015.03 | 494.25  | -1.04 |
| TDEL0C03550      | <i>Anc_7.492_YBL049W_MOH1</i>                                                             | 189.09  | 89.77   | -1.07 |
| TDEL0H04450**,** | <i>Anc_7.6_YOR374W_ALD4</i>                                                               | 2790.18 | 883.98  | -1.66 |
| TDEL0H04500      | <i>None</i>                                                                               | 505.82  | 239.16  | -1.08 |
| TDEL0C05240      | <i>Anc_3.386_YBR126C_TPS1</i>                                                             | 2297.85 | 1130.33 | -1.02 |
| TDEL0A00300      | <i>Anc_3.11_YNL327W_EGT2</i>                                                              | 1436.95 | 705.1   | -1.03 |
| TDEL0B02120**    | <i>Anc_5.708_YKR097W_PCK1</i>                                                             | 142.3   | 57.36   | -1.31 |
| TDEL0G04910      | <i>None</i>                                                                               | 2657.68 | 1038.52 | -1.36 |
| TDEL0H04490      | <i>None</i>                                                                               | 417.79  | 192.3   | -1.12 |
| TDEL0B00960**    | <i>Anc_8.801_YMR250W_GAD1</i>                                                             | 993.32  | 465.26  | -1.09 |
| TDEL0G01820**    | <i>Anc_4.9_YHL032C_GUT1</i>                                                               | 1450.81 | 509.11  | -1.51 |
| TDEL0H01960*     | <i>Anc_7.248_YER067W_RGI1_YIL057C_RGI2</i>                                                | 615.46  | 183.96  | -1.74 |
| TDEL0H03410      | <i>Anc_7.110_YHL021C_AIM17</i>                                                            | 1713.68 | 693.58  | -1.3  |
| TDEL0G04760      | <i>None</i>                                                                               | 9784.29 | 3968.18 | -1.3  |
| TDEL0H04480      | <i>None</i>                                                                               | 7605.79 | 2054.54 | -1.89 |
| TDEL0B06230**    | <i>Anc_1.384_YLR251W_SYM1</i>                                                             | 115.5   | 55.21   | -1.06 |
| TDEL0A00950      | <i>None</i>                                                                               | 4708.18 | 2187.3  | -1.11 |
| TDEL0D05820**,** | <i>Anc_3.514_YGL205W_POX1</i>                                                             | 697.91  | 305.94  | -1.19 |
| TDEL0C02900      | <i>None</i>                                                                               | 2157.25 | 708.44  | -1.61 |
| TDEL0F00170      | <i>None</i>                                                                               | 535.08  | 221.04  | -1.28 |
| TDEL0B06310*     | <i>Anc_1.375_YFR015C_GSY1_YLR258W_GSY2</i>                                                | 1318.21 | 570.62  | -1.21 |
| TDEL0D04470**    | <i>Anc_3.176_YAR035W_YAT1</i>                                                             | 631.43  | 159.06  | -1.99 |
| TDEL0B00110      | <i>None</i>                                                                               | 39.85   | 19.29   | -1.05 |
| TDEL0C00160      | <i>None</i>                                                                               | 40.29   | 19.48   | -1.05 |
| TDEL0D03060      | <i>Anc_4.146_YGR008C_STF2_YLR327C_TMA10</i>                                               | 2032.38 | 733.81  | -1.47 |
| TDEL0E00130**    | <i>Anc_3.217_YBR018C_GAL7</i>                                                             | 5447.66 | 2480.8  | -1.13 |
| TDEL0A06070      | <i>Anc_8.661_YPL147W_PXA1</i>                                                             | 431.99  | 206.53  | -1.06 |
| TDEL0E00180      | <i>None</i>                                                                               | 11043.2 | 4472.84 | -1.3  |
| TDEL0B05680*     | <i>Anc_1.435_YEL011W_GLC3</i>                                                             | 841.87  | 411.07  | -1.03 |
| TDEL0B06280      | <i>Anc_1.378_YLR257W_YLR257W</i>                                                          | 426.12  | 195.76  | -1.12 |



**Table S9 Genes Increasing In Expression in *T. delbrueckii* *sir* Mutants**

Listed below are twenty-two subtelomeric genes and silent mating type loci genes that were de-repressed in all three *T. delbrueckii* *sir* mutants. Many subtelomeric genes on the same telomeric arm are adjacent to each other (for example, *TDEL0B00100* and *TDEL0B00110*). For those genes that have *S. cerevisiae* orthologs, the *S. cerevisiae* systematic name and three-letter name is provided.

| T. delbrueckii Gene | <i>S. cerevisiae</i> ortholog              | Wild type FPKM | <i>kos3Δ</i> FPKM | <i>sir2Δ</i> FPKM | <i>sir4Δ</i> FPKM | Description                          |
|---------------------|--------------------------------------------|----------------|-------------------|-------------------|-------------------|--------------------------------------|
| <i>TDEL0E00330</i>  | a1 gene at T. delbrueckii Chr V HMR        | 0.67           | 40.95             | 44.37             | 53.57             | Silent mating type locus             |
| <i>TDEL0E00340</i>  | a2 gene at Chr V HMR                       | 4.91           | 30.53             | 28.16             | 29.11             | Silent mating type locus             |
| <i>TDEL0G00190</i>  | a1 gene at T. delbrueckii Chr VII HMR      | 0.67           | 39.07             | 43.35             | 52.26             | Silent mating type locus             |
| <i>TDEL0E00310</i>  | N/A                                        | 14.29          | 37.15             | 37.41             | 48.66             | Adjacent to silent mating type locus |
| <i>TDEL0E00320</i>  | N/A                                        | 8.39           | 33.06             | 20.1              | 28.03             | Adjacent to silent mating type locus |
| <i>TDEL0A08040</i>  | N/A                                        | 10.44          | 61.2              | 37.98             | 46.64             | Subtelomeric ( <i>TEL01R</i> )       |
| <i>TDEL0A08050</i>  | N/A                                        | 3.05           | 10.85             | 6.85              | 8.77              | Subtelomeric ( <i>TEL01R</i> )       |
| <i>TDEL0A08060</i>  | N/A                                        | 1.49           | 26.46             | 21.86             | 24.12             | Subtelomeric ( <i>TEL01R</i> )       |
| <i>TDEL0B00100</i>  | N/A                                        | 2.28           | 503.74            | 402.2             | 608.34            | Subtelomeric ( <i>TEL02L</i> )       |
| <i>TDEL0B00110</i>  | N/A                                        | 2.77           | 192.53            | 190.95            | 168.79            | Subtelomeric ( <i>TEL02L</i> )       |
| <i>TDEL0B07690</i>  | N/A                                        | 101.14         | 503.52            | 1056.35           | 683.41            | Subtelomeric ( <i>TEL02R</i> )       |
| <i>TDEL0C06910</i>  | <i>YCL055W (KAR4)</i>                      | 1.85           | 14.01             | 16.53             | 10.11             | Subtelomeric ( <i>TEL03R</i> )       |
| <i>TDEL0C06990</i>  | <i>DIC1</i> copy in X-region of <i>HML</i> | 77.04          | 166.36            | 131.33            | 171.66            | Subtelomeric ( <i>TEL03R</i> )       |
| <i>TDEL0D00100</i>  | N/A                                        | 26.89          | 46.74             | 59.84             | 48.29             | Subtelomeric ( <i>TEL04L</i> )       |
| <i>TDEL0D06610</i>  | N/A                                        | 25.19          | 60.31             | 54.86             | 57.05             | Subtelomeric ( <i>TEL04R</i> )       |
| <i>TDEL0D06680</i>  | N/A                                        | 5.78           | 22.74             | 17.81             | 18.5              | Subtelomeric ( <i>TEL04R</i> )       |
| <i>TDEL0E00100</i>  | N/A                                        | 5.86           | 33.8              | 40.74             | 34.04             | Subtelomeric ( <i>TEL05L</i> )       |
| <i>TDEL0E00110</i>  | N/A                                        | 9.01           | 32.16             | 21.11             | 28.72             | Subtelomeric ( <i>TEL05L</i> )       |
| <i>TDEL0H04510</i>  | N/A                                        | 2.62           | 51.31             | 53.12             | 43.62             | Subtelomeric                         |

|             |     |       |        |        |        |                          |
|-------------|-----|-------|--------|--------|--------|--------------------------|
|             |     |       |        |        |        | (TEL08R)                 |
| TDEL0H04520 | N/A | 32.92 | 80.85  | 121.08 | 83.02  | Subtelomeric<br>(TEL08R) |
| TDEL0H04530 | N/A | 26.32 | 96.68  | 123.82 | 96.46  | Subtelomeric<br>(TEL08R) |
| TDEL0H04540 | N/A | 3.31  | 284.53 | 430.43 | 211.64 | Subtelomeric<br>(TEL08R) |

**Table S10 ChIP-Seq Reads Per Data Set**

| Strain   | Alias            | Sample | Total_Reads | Reads_Mapped | Genome-wide_Median |
|----------|------------------|--------|-------------|--------------|--------------------|
| JRY10152 | scSir1_IP        | IP     | 38416222    | 20135820     | 132                |
| JRY10152 | scSir1_in        | input  | 24223214    | 13916174     | 91                 |
| JRY9316  | scNoTag_IP       | IP     | 41359126    | 33887088     | 211                |
| JRY9316  | scNoTag_in       | input  | 30951676    | 22488089     | 143                |
| JRY10160 | kos3_IP          | IP     | 30692204    | 28180256     | 208                |
| JRY10160 | kos3_in          | input  | 37857090    | 23046669     | 83                 |
| JRY10161 | tdSir2_IP        | IP     | 64772046    | 61078532     | 283                |
| JRY10161 | tdSir2_in        | input  | 33789380    | 26576719     | 253                |
| JRY10162 | tdSir4_IP        | IP     | 34959374    | 26516814     | 198                |
| JRY10162 | tdSir4_in        | input  | 49459360    | 35696614     | 267                |
| JRY10156 | td_NoTag_IP      | IP     | 34902818    | 30961776     | 271                |
| JRY10156 | td_NoTag_in      | input  | 53648772    | 46344215     | 431                |
| JRY10185 | td_sir4_kos3Δ_IP | IP     | 33347158    | 23556275     | 39                 |
| JRY10184 | td_sir2_kos3Δ_IP | IP     | 42035285    | 31642374     | 152                |
| JRY10184 | td_sir2_kos3Δ_in | input  | 42467510    | 8631392      | 30                 |

**Table S11 RNA-Seq Reads Per Data Set**

| Strain   | Alias         | Total Reads | Reads Mapped | % Reads Mapped | % Mapped Non-Uniquely |
|----------|---------------|-------------|--------------|----------------|-----------------------|
| JRY9316  | wildTypeA     | 15747860    | 14480231     | 92             | 6.9                   |
| JRY9316  | wildTypeB     | 20204590    | 18636063     | 92.2           | 6.8                   |
| JRY9316  | wildTypeC     | 19988764    | 18323263     | 91.7           | 9                     |
| JRY10153 | sir1_A        | 16667732    | 15105456     | 90.6           | 7.1                   |
| JRY10154 | sir1_B        | 21854922    | 20320743     | 93             | 6.9                   |
| JRY10155 | sir1_C        | 25010370    | 23014267     | 92             | 7.1                   |
| JRY10156 | td_Wildtype_A | 15286600    | 14186364     | 92.8           | 2.2                   |
| JRY10156 | td_Wildtype_B | 19561586    | 17479536     | 89.4           | 3.8                   |
| JRY10156 | td_Wildtype_C | 15787518    | 14440572     | 91.5           | 2.7                   |
| JRY10157 | kos3_A        | 18855860    | 16598907     | 88             | 2.4                   |
| JRY10157 | kos3_B        | 12373772    | 10960974     | 88.6           | 2.4                   |
| JRY10157 | kos3_C        | 9463160     | 8657370      | 91.5           | 2.1                   |



|          |            |          |          |      |     |
|----------|------------|----------|----------|------|-----|
| JRY10158 | td_sir2_A  | 22461150 | 19501160 | 86.8 | 1.9 |
| JRY10158 | td_sir2_B  | 34093000 | 30790506 | 90.3 | 2.7 |
| JRY10158 | td_sir2_C  | 17313930 | 15385654 | 88.9 | 2.3 |
| JRY10159 | td_sir4_A  | 34504902 | 31345497 | 90.8 | 2.3 |
| JRY10159 | td_sir4_B  | 19359522 | 17642827 | 91.1 | 2.7 |
| JRY10159 | td_sir4_C  | 22980378 | 20541732 | 89.4 | 2.3 |
| JRY10163 | td_ago1_A  | 20246704 | 18125537 | 89.5 | 1.8 |
| JRY10163 | td_ago1_B  | 17229086 | 15783662 | 91.6 | 2.3 |
| JRY10163 | td_ago1_C  | 25218810 | 22352227 | 88.6 | 1.8 |
| JRY10164 | td_dcr1_A  | 26475104 | 24049831 | 90.8 | 2.9 |
| JRY10164 | td_dcr1_B  | 26475104 | 24049831 | 90.8 | 2.9 |
| JRY10164 | td_dcr1_C  | 18018972 | 15589654 | 86.5 | 2.5 |
| JRY10165 | ago1dcr1_A | 17995398 | 15313261 | 85.1 | 2   |
| JRY10165 | ago1dcr1_B | 24626138 | 23131252 | 93.9 | 2.4 |
| JRY10165 | ago1dcr1_C | 17013842 | 16058396 | 94.4 | 3.3 |
